# Supplementary material
Source: Springer Nature journal article supplement (https://www.springermedizin.de/resource/supplementary/12993_2012_452_MOESM4_ESM.pdf/9617790)

A

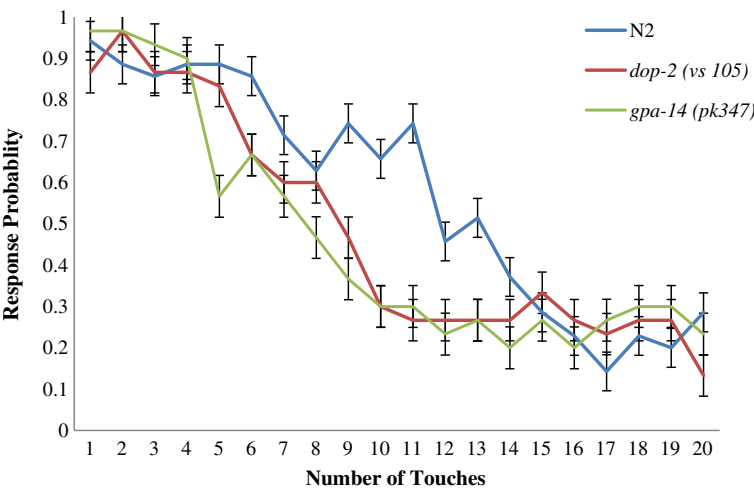

B

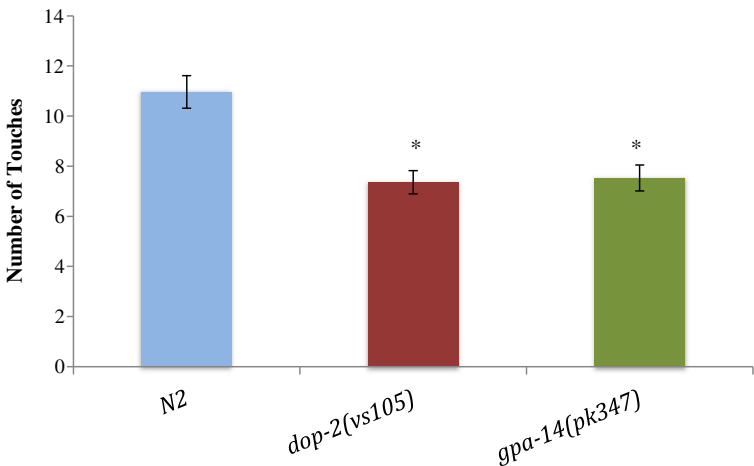

Supplement: MOESM4 [file 9617790]
